1 **Title:** Monitoring and understanding household clustering of SARS-CoV-2 cases using surveillance data in  
2 Fulton County, Georgia

3 **Authors:** Carol Y. Liu<sup>1</sup>, Sasha Smith<sup>2</sup>, Allison T. Chamberlain<sup>1</sup>, Neel R. Gandhi<sup>1,3</sup>, Fazle Khan<sup>2</sup>, Steve  
4 Williams<sup>4</sup>, Sarita Shah<sup>1,3</sup>

5 **Affiliations:** <sup>1</sup>Emory University Rollins School of Public Health, Atlanta, GA

6 <sup>2</sup>Fulton County Board of Health, Atlanta, GA

7 <sup>3</sup>Emory School of Medicine, Atlanta, GA

8 <sup>4</sup>Fulton County Government, Atlanta, GA

9 **Word Count:** 2,593

10 **Corresponding Author:** Carol Liu, Emory University Rollins School of Public Health, Atlanta, GA

11 **Abstract:**

12 **Background:** Households are important for SARS-CoV-2 transmission due to high intensity exposure in  
13 enclosed living spaces over prolonged durations. Using contact tracing, the secondary attack rate in  
14 households is estimated at 18-20%, yet no studies have examined COVID-19 clustering within  
15 households to inform testing and prevention strategies. We sought to quantify and characterize  
16 household clustering of COVID-19 cases in Fulton County, Georgia and further explore age-specific  
17 patterns in household clusters.

18 **Methods:** We used state surveillance data to identify all PCR- or antigen-confirmed cases of COVID-19 in  
19 Fulton County, Georgia. Household clustered cases were defined as cases with matching residential  
20 address with positive sample collection dates within 28 days of one another. We described proportion of  
21 COVID-19 cases that were clustered, stratified by age and over time and explored trends in age of first  
22 diagnosed case within clusters and age patterns between first diagnosed case and subsequent  
23 household cases.

24 **Results:** Between 6/1/20–10/31/21, there were 106,233 COVID-19 cases with available address  
25 reported in Fulton County. Of these, 31,449 (37%) were from 12,955 household clusters. Children were  
26 more likely to be in household clusters than any other age group and children increasingly accounted for  
27 the first diagnosed household case, rising from 11% in February 2021 to a high of 31% in August 2021.  
28 Bubble plot density of age of first diagnosed case and subsequent household cases mirror age-specific  
29 patterns in household social mixing.

30 **Discussion:** One-third of COVID-19 cases in Fulton County were part of a household cluster. High  
31 proportion of children in household clusters reflects higher probability of living in larger homes with  
32 caregivers or other children. Increasing probability of children as the first diagnosed case coincide with  
33 temporal trends in vaccine roll-out among the elderly in March 2021 and the return to in-person  
34 schooling for the Fall 2021 semester. While vaccination remains the most effective intervention at  
35 reducing household clustering, other household-level interventions should also be emphasized such as  
36 timely testing for household members to prevent ongoing transmission.

37

38

## 39 Background

40 Understanding the spread of SARS-CoV-2 has been of critical importance<sup>1-5</sup>. From the  
41 perspective of public health policy and practice, identifying high-risk settings where COVID-19  
42 transmission occurs provides important insights for targeting interventions such as contact  
43 tracing and directed testing efforts to reduce further disease spread. Despite intense scrutiny  
44 and high public interest in large superspreader events<sup>6,7</sup>, smaller clusters of household cases  
45 have collectively more impact on total case counts. For example, investigations of the initial  
46 SARS-CoV-2 outbreak in Wuhan, China found that 78-85% of infection clusters occurred in  
47 families<sup>8</sup>, a trend that continued even after relaxation of the most stringent lockdown measures  
48 that confined cases and their contacts at home<sup>9</sup>.

49 Household contacts are particularly vulnerable to SARS-CoV-2 transmission. Household  
50 members experience high intensity exposure over prolonged durations and share enclosed and,  
51 at times, crowded living environments<sup>10</sup> – factors that together increase the probability of  
52 transmission from an infected individual to a susceptible household contact<sup>11-13</sup>. While non-  
53 pharmaceutical interventions such as mask-wearing and social distancing effectively reduce  
54 community transmission of SARS-CoV-2<sup>14,15</sup>, consistently adopting such stringent preventative  
55 measures is difficult in practice, particularly in a household. Furthermore, cases can be  
56 infectious prior to symptom-onset<sup>16</sup>, which precludes index household cases from taking early  
57 preventative measures to protect household members. Several systematic reviews drawing  
58 data from multiple countries highlight the significance of household transmission in sustaining  
59 the COVID-19 pandemic. These reviews estimate the household secondary attack rate of the  
60 original variant to be between 16.4–30%<sup>17-21</sup> and higher based on preliminary evidence for  
61 alpha (24.5% from meta-analysis of three studies<sup>22</sup>) and delta variants<sup>23,24</sup>. Finally, the  
62 household presents a unique social context where intergenerational contact between children,  
63 parents and grandparents is higher than other social settings, such as work and school; in those  
64 settings, individuals tend to be in contact with other individuals of similar age<sup>25-29</sup>. As such,  
65 households can be an important setting for transmission from children to older adults who  
66 have increased susceptibility<sup>30</sup> and heightened probability of severe disease<sup>31</sup>.

67           Despite known heightened transmission between household members and the  
68 importance of households in the context of intergenerational transmission, there is limited  
69 quantification of the extent of household clustering of COVID-19 in the US. We sought to use  
70 surveillance data to quantify the extent of household clustering of COVID-19 among confirmed  
71 COVID-19 cases in Fulton County, Georgia. Fulton County, located in metropolitan Atlanta, is an  
72 urban county in Georgia with a population of 1.1 million. We postulate that household  
73 clustered cases continue to account for a substantial proportion of cases detected by routine  
74 surveillance. We further explore temporal trends in clustering, the distribution of household-  
75 clustered cases among key demographic groups and focus our analysis on age profiles of cases  
76 in household clusters, exploring trends in age of first diagnosed case within clusters and age  
77 patterns between first diagnosed case and subsequent household cases. Our analysis uniquely  
78 leverages a robust and large public health database of routinely-collected COVID-19 case data  
79 to identify temporally clustered cases residing at the same residential address and quantify  
80 household clustering behavior.

## 81 **Methods**

### 82 Study design and population

83           We conducted a retrospective cohort analysis of persons residing in Fulton County,  
84 Georgia, who were diagnosed with PCR-confirmed SARS-CoV-2 infection. We obtained data for  
85 COVID-19 cases from Georgia Department of Public Health's (DPH) State Electronic Notifiable  
86 Disease Surveillance System (SENDSS) for Fulton County between June 1<sup>st</sup>, 2020 and Oct 31<sup>st</sup>,  
87 2021. Per the state's COVID-19 response statutes, all individuals with a positive diagnosis for  
88 SARS-CoV-2 must be notified to the Georgia DPH. All reported cases are captured by DPH into  
89 the SENDSS database. Cases prior to June 1<sup>st</sup>, 2020 were excluded due to the limited availability  
90 of testing early in the pandemic where only those with selected risk factors (e.g., age), COVID-  
91 related symptoms, or known exposure were eligible for testing. These eligibility criteria were  
92 removed in Fulton County in early June, 2020, such that all persons could access free testing,  
93 regardless of symptoms or risk factors. Cases after Oct 31<sup>st</sup>, 2021 were excluded as cluster data  
94 are likely incomplete due to ongoing household transmission chains.

95 Definitions and outcome measures

96 To identify cases originating from the same residence, we standardized addresses using  
97 a geocoder which cross-referenced the case addresses with the US Postal Service address  
98 database and only cases with a valid and complete residential address were retained. Since our  
99 primary interest was in case clustering at residential locations, addresses belonging to  
100 communal residential locations (e.g., nursing homes, correctional facilities, homeless shelters  
101 and dormitories) were excluded, as were apartment addresses missing the unit number where  
102 cases from multiple units could be erroneously classified as from the same household.

103 Clustered cases were defined as cases with a perfectly matching standardized street  
104 address, including unit number for apartment complex addresses. Household clusters were  
105 defined as >2 COVID-19 cases residing at the same residential address with positive sample  
106 collection dates within 28 days of one another (Supplementary Figure 1). With a median  
107 incubation period estimated at 5.1 days<sup>32</sup> and a median infectious period estimated at between  
108 7-10 days<sup>33</sup>, the 28 days would cover two infectious periods, one incubation period, and a 3-4  
109 day lag between symptom-onset and positive sample collection<sup>34</sup>. Given the high proportion of  
110 asymptomatic and undiagnosed COVID-19 cases, this would allow two diagnosed cases with  
111 one undiagnosed case in between them in the transmission chain to be classified as a single  
112 household cluster.

113 Variables collected during routine surveillance and utilized in this analysis were age,  
114 gender, race/ethnicity, address, symptom status, hospitalization, date of positive sample  
115 collection and date of symptom-onset. We estimated the extent of COVID-19 clustering among  
116 cases by calculating the proportion of all COVID-19 cases that belong to a household cluster,  
117 based on our operational definition of a cluster described above, stratified by age group,  
118 gender, race/ethnicity, symptom and hospitalization status and over month of the pandemic.  
119 We computed statistics related to cluster characteristics including cluster size and duration  
120 between first and last diagnosed case within a cluster. We focus our analysis on patterns in age  
121 profiles of cases in household clusters by describing the distribution of the age of first  
122 diagnosed case within a household cluster over time and visualizing patterns between age

123 group of first diagnosed case and age group of subsequent household cases. For the latter  
124 visualization, we expected age-specific relationships between first and subsequent cases within  
125 households to mirror the age-specific mixing patterns within household contacts documented  
126 in social mixing surveys<sup>25</sup>.

127 This activity was determined to be consistent with public health surveillance activity as  
128 per title 45 code of Federal Regulations 46.102(l)(2). The Emory University institutional review  
129 board approved this activity with a waiver of informed consent.

## 130 Results

131 A total of 106,233 COVID-19 cases were reported in Fulton County between 6/1/20-  
132 10/31/21, of which 84,383 (79.4%) were included in our analysis. Reasons for exclusion include  
133 residing in a long-term care facility (N=4,540), addresses not matched to the geocoding  
134 database (N= 5,991), live in communal places (ex. correctional facilities, shelters or dorms) (N=  
135 1,509) and apartments with no unit number (N= 9, 810) (Supplemental Figure 2). Included  
136 individuals were similar to excluded individuals with respect to age, gender, race/ethnicity,  
137 symptom and hospitalization status (Supplemental Table 1). A majority of cases were female  
138 (N= 44,940; 53%), 14,726 (17%) were children aged 0-18 years and 10,555 (12%) were adults  
139 aged 60 years and above (Table 1). The largest racial/ethnicity group was black, non-Hispanic  
140 individuals (N = 38,128, 45%), followed by white, non-Hispanic individuals (N=28,272, 34%)  
141 followed by Hispanic individuals of all races (N= 7776, 9%).

142 Among these cases, 37,432 (44%) had an address that matched at least one other case;  
143 31,449 (37%) (Table 1) had positive sample collection date within 28 days of another household  
144 case. The age-stratified probability of being part of a household cluster followed a U-shaped  
145 trend where children aged 0-18 years were most likely to be part of a household cluster (55%),  
146 followed by adults aged 40 years and above (39%), with young adults between 19-39 years the  
147 least likely to be in a household cluster (28%). We observed higher clustering among Hispanic  
148 (47%) and non-Hispanic, Asian (47%) persons compared to non-Hispanic black (33%) and non-  
149 Hispanic white (35%) persons. There are no differences in clustering by gender or reported  
150 symptom status.

151 We observed temporal trends in household clustering. The proportion of household  
152 cases identified in clusters fluctuated between 30-40% each month. Clustering increased  
153 between November 2020 to January 2021, steadily declined between Feb to June 2021, arrived  
154 at a low in June 2021, and has since rebounded to earlier levels (**Fig 1**). Trends in probability of  
155 household clustering by age of case (ex. children aged 0-18 years most likely to be in household  
156 clusters) have stayed consistent over the course of the pandemic (**Figure 2**).

157 Among 12,955 household clusters, the majority of clusters had 2 individuals (N=9216  
158 clusters, 71%), although some clusters had  $\geq 6$  individuals (N=122, 1.0%; **Table 2**). Excluding  
159 clusters with multiple cases diagnosed on the first day, the first diagnosed case was 0-18 years  
160 in 1,314 (15%) of clusters, 19-29 years in 1,614 (19%) of clusters, 30-39 years in 1,592 (18%) of  
161 clusters, 40-49 years in 1,593 (18%) of clusters 50-59 years in 1,336 (15%) of clusters and above  
162 60 years in 1,235 (14%) of clusters. The proportion of children diagnosed as the first case in the  
163 cluster increased from 11% in February 2021 to a high of 31% in August 2021 (**Figure 3**). In  
164 contrast, proportion of elderly greater than 50 years of age diagnosed as the first case in the  
165 cluster decreased during the same time period from 34% to 19%. Clusters most often  
166 consisted of individuals in the same age group, as shown by the high density of bubbles along  
167 the diagonal in the bubble plot counting clusters by age of first diagnosed case and age of  
168 subsequent diagnosed cases in the household (**Figure 4**). Two other diagonals are present. One  
169 below the main diagonal consisting of 25-50-year-old first diagnosed case clustered with 0-20-  
170 year-old subsequent household cases and another diagonal above the main diagonal consisting  
171 of 10-25-year-old first diagnosed case clustered with 40-55-year-old secondary cases.

## 172 **Discussion:**

173 Over one-third of reported COVID-19 cases in Fulton County between June 2020 and August  
174 2021 were part of a household cluster. Children aged 0-18 years were substantially more likely  
175 to belong to a household cluster than any other age group and increasingly represented the  
176 first positive detected case in the household, rising from 11% in February 2021 to 31% in August  
177 2021. Age patterns between first and subsequent cases within household clusters mirror  
178 household social mixing patterns where clusters of individuals of the same age are most

179 common followed by intergenerational clusters between parents and children. High probability  
180 of household clustering and cross-age transmission underscore the importance of contact  
181 tracing, testing, and quarantining of household contacts and the need for innovative strategies  
182 such as self-testing of household members for early identification of infections.

183 Findings from our study adds evidence to the outsized role of household clustering in  
184 shaping the course of the pandemic. Our study results are comparable to those reported by  
185 Massachusetts State Department of Public Health in their “cluster-busting” strategy for COVID-  
186 19 control<sup>34</sup> where a third of cases reported between September and October 2020 belonged  
187 to a household cluster<sup>35</sup>. Small reductions in household transmission have potential to  
188 meaningfully reduce overall cases. On a daily basis, a larger proportion of close proximity  
189 human contact occurs within households<sup>36–38</sup> rather than in community settings such as schools,  
190 nursing homes or large gatherings notorious for superspreading. While households rarely  
191 become superspreading locations, the majority of Americans (72%)<sup>39</sup> live with at least one  
192 other individual who would be highly exposed to an index household case.

193 The higher proportion of children in household clusters likely reflects higher probability of  
194 living in a home with another individual, either other children or adult caregivers. Increased  
195 probability of child cases as the first diagnosed case in household clusters starting March 2021  
196 coincide with vaccination of older age groups. Further increases starting in August 2021  
197 coincide with the return-to-school of largely unvaccinated children for the Fall 2021 semester.  
198 Collectively, these trends suggest that children are increasingly important for transmission  
199 within households despite lower infectiousness compared to adults.<sup>40,41</sup> Our bubble plot of age  
200 profiles within household clusters show that clusters are dominated by those of individuals of  
201 the same age, likely couples, roommates or sibling, and those in intergenerational age groups,  
202 likely parent and child. These findings suggest the importance of age-specific mixing patterns in  
203 determining the magnitude of age-specific clustering within households.

204 As the COVID-19 pandemic continues, household-level interventions to reduce household  
205 clustering should be further incorporated into the existing response. For example, the US  
206 Centers for Disease Control and Prevention recommends household index cases quarantine in a

207 separate bedroom and bathroom and limit sharing of food and kitchenware.<sup>42</sup> Yet distancing  
208 and safe quarantine are not feasible within all households and an estimated 20% of households  
209 did not have sufficient bedrooms and bathrooms to safely quarantine an infected person at  
210 home.<sup>43</sup> Vaccination remains the single most effective intervention at preventing infection and  
211 severe disease;<sup>44</sup> however, while coverage among children is still low,<sup>45</sup> additional interventions  
212 should be explored such as rapid antigen tests for all household members to facilitate early  
213 diagnosis or provision of a box of surgical or KN95 masks to increase safer household contact  
214 and prevent onward transmission outside of the household.

215 We report several limitations. Our analysis used surveillance data which is known to under-  
216 ascertain COVID-19 cases, especially during the early days of the pandemic<sup>46</sup>. Individuals with  
217 known household exposure may be more likely to present for testing if health conscious or less  
218 likely to present if they believe knowing their infection status will have little impact on  
219 treatment course and outcome. Changing testing and screening strategies may also affect age-  
220 related clustering trends. Moreover, Children 0-18 years were slightly more likely to be included  
221 compared to young adults aged 19-29 year and the elderly aged 70 years and above.  
222 Furthermore, we do not know if members within household clusters infected each other or  
223 whether some subsequent cases were infected from the community. The distribution of  
224 infections caused by household exposure versus community exposure has implications for  
225 disease control strategies. Finally, the first diagnosed case may not represent the source of  
226 infection for the household.

227 The unique advantage of our study is that we use rigorous methods to identify cases from  
228 surveillance data residing at the same residential address, producing the first estimates of the  
229 extent of household clustering over time in a large, diverse metropolitan area. No other study  
230 has used public health surveillance data to systematically track temporal and demographic  
231 trends of household clusters of COVID-19 in the US. The use of routinely collected surveillance  
232 data provides a more accessible, rapid approach for health departments to evaluate household  
233 clustering and inform interventions. In addition, our study finds evidence of higher probability  
234 of household clustering among children and Hispanic and Asian persons and early indication of  
235 increases in the proportion of household clusters with a child as the first diagnosed case.



236           In conclusion, we used residential address to identify cases temporally clustered within a  
237 household. Our analysis found that between June 1, 2020 and October 31, 2021, 37% of  
238 reported cases in Fulton County, Georgia belonged to household clusters. Our findings  
239 complement the high household secondary attack rates found in cohort studies of household  
240 transmission of SARS-CoV-2 and further quantifies the extent of household clustering at a  
241 population level. Our results support the consideration of improved public health response to  
242 reducing household clustering and within-household transmission such as within-household  
243 masking and rapid testing for household contacts for far-reaching public health impact in  
244 controlling COVID-19.

245

246

247 Table 1. Demographic characteristics of confirmed COVID-19 cases with a valid residential address and  
 248 proportion of cases identified in household clusters – June 1, 2020 to October 31, 2021

|                         |               | <b>Total</b>  | <b>Col%</b> | <b>HH-clustered<br/>individuals<br/>(n=27,898)</b> | <b>% HH-<br/>clustered</b> |
|-------------------------|---------------|---------------|-------------|----------------------------------------------------|----------------------------|
| <b>Total population</b> |               | <b>84,383</b> | --          | <b>31,449</b>                                      | <b>37</b>                  |
| <b>Gender</b>           | Female        | 44940         | 53          | 16944                                              | 38                         |
|                         | Male          | 39150         | 46          | 14408                                              | 37                         |
|                         | Missing       | 293           | 0           | 97                                                 | 33                         |
| <b>Age group</b>        | 0-18          | 14726         | 17          | 8089                                               | 55                         |
|                         | 19-29         | 18647         | 22          | 5080                                               | 27                         |
|                         | 30-39         | 16125         | 19          | 4820                                               | 30                         |
|                         | 40-49         | 13050         | 15          | 5021                                               | 38                         |
|                         | 50-59         | 11254         | 13          | 4298                                               | 38                         |
|                         | 60-69         | 6263          | 7           | 2418                                               | 39                         |
|                         | 70 plus       | 4292          | 5           | 1715                                               | 40                         |
| <b>Race/ethnicity</b>   | Asian, NH     | 3503          | 4           | 1693                                               | 48                         |
|                         | Black, NH     | 38128         | 45          | 13339                                              | 35                         |
|                         | White, NH     | 28272         | 34          | 10038                                              | 36                         |
|                         | Hispanic, all | 7776          | 9           | 3769                                               | 48                         |
|                         | Other, NH     | 2678          | 3           | 1073                                               | 40                         |
|                         | Missing       | 4026          | 5           | 1537                                               | 38                         |
| <b>Symptom status</b>   | No            | 8812          | 10          | 3299                                               | 37                         |
|                         | Yes           | 49247         | 58          | 18468                                              | 38                         |
|                         | Unknown       | 26324         | 31          | 9682                                               | 37                         |
| <b>Hospitalized</b>     | No            | 46602         | 91          | 17974                                              | 39                         |
|                         | Yes           | 4758          | 9           | 1476                                               | 31                         |

249  
 250  
 251  
 252  
 253  
 254  
 255  
 256  
 257  
 258

259

260 Table 2. Characteristics of household clusters (N= 11,523) in Fulton County – June 1, 2020 October 31,  
261 2021 .

|                                                                    |                  | <b>Total HH<br/>Clusters<br/>(N=11,523)</b> | <b>%</b> |
|--------------------------------------------------------------------|------------------|---------------------------------------------|----------|
| <b>Number of individuals in cluster</b>                            | 2                | 9216                                        | 71       |
|                                                                    | 3-5              | 3617                                        | 28       |
|                                                                    | 6+               | 122                                         | 1        |
| <b>Days between first and last diagnosis in cluster</b>            | 0                | 3398                                        | 26       |
|                                                                    | 1-7 days         | 6198                                        | 48       |
|                                                                    | 8-14 days        | 2166                                        | 17       |
|                                                                    | 15-28 days       | 1110                                        | 9        |
|                                                                    | 29 or more days  | 83                                          | 1        |
| <b>Clusters with more than one case on first date of diagnosis</b> |                  | 4268                                        | 33       |
| <b>Age of first diagnosed case in cluster</b>                      | 0-18 yrs         | 1314                                        | 15       |
|                                                                    | 19-29 yrs        | 1614                                        | 19       |
|                                                                    | 30-39 yrs        | 1592                                        | 18       |
|                                                                    | 40-49 yrs        | 1593                                        | 18       |
|                                                                    | 50-59 yrs        | 1336                                        | 15       |
|                                                                    | 60 yrs and above | 1235                                        | 14       |

262

263

264

265

266

267

268

269

270

271

272

273

274

275 **Figure 1.** Temporal trend in the proportion of diagnosed cases in Fulton County, Georgia, that were  
276 identified in household clusters stratified by the month of positive sample collection date (dark blue  
277 line), with 95% confidence interval around the point estimate. A bar chart of monthly confirmed cases in  
278 Fulton County is provided on the bottom left for reference.

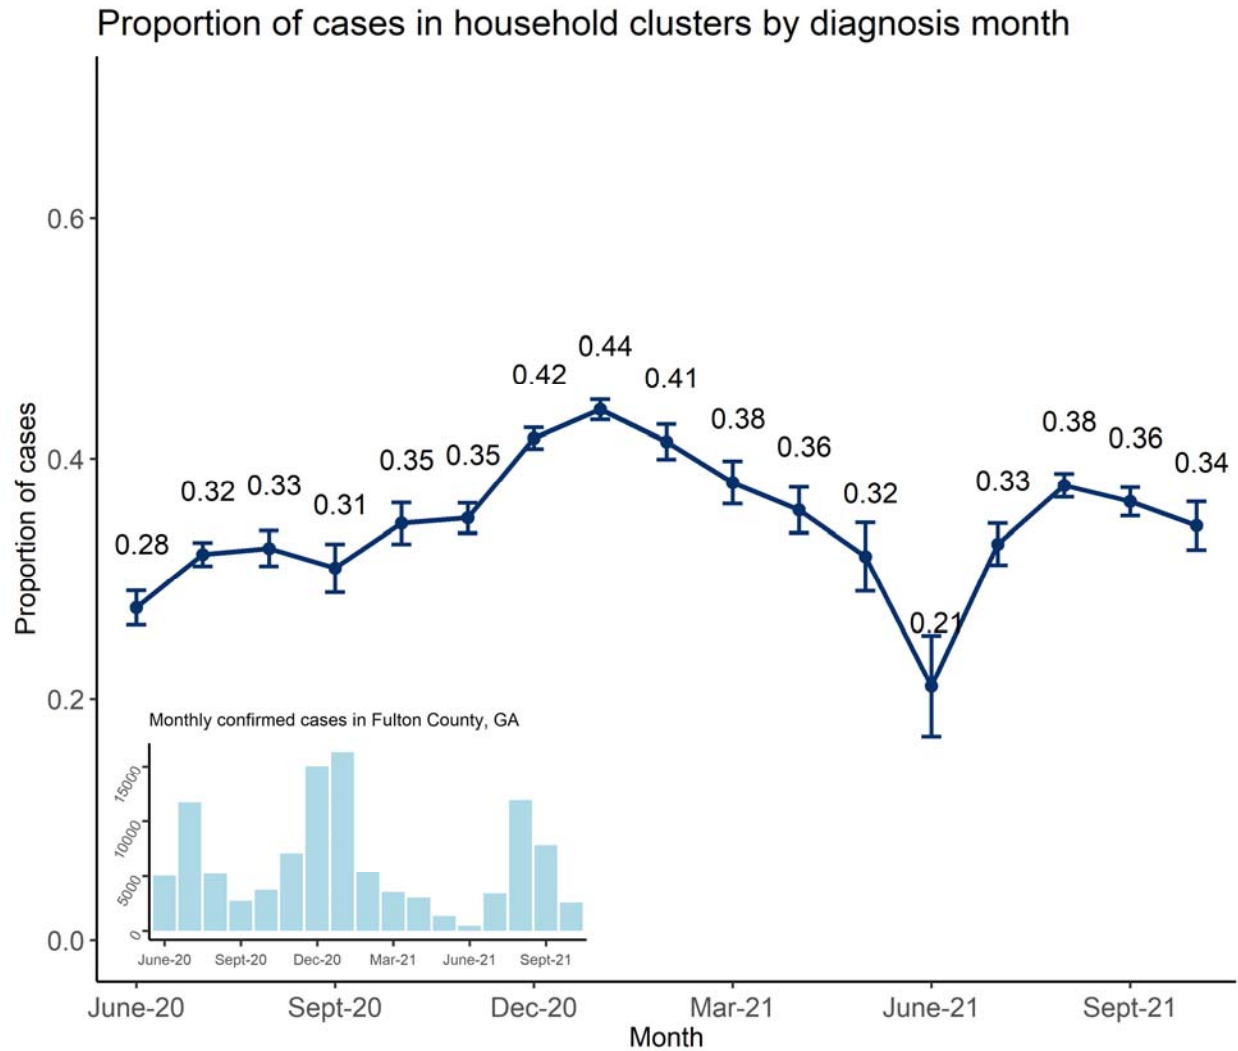

279  
280  
281  
282  
283  
284  
285

286 **Figure 2.** Temporal trend in the proportion of diagnosed cases in Fulton County, Georgia, that were  
287 identified in household clusters stratified by month of positive sample collection date (x-axis) and by age  
288 group

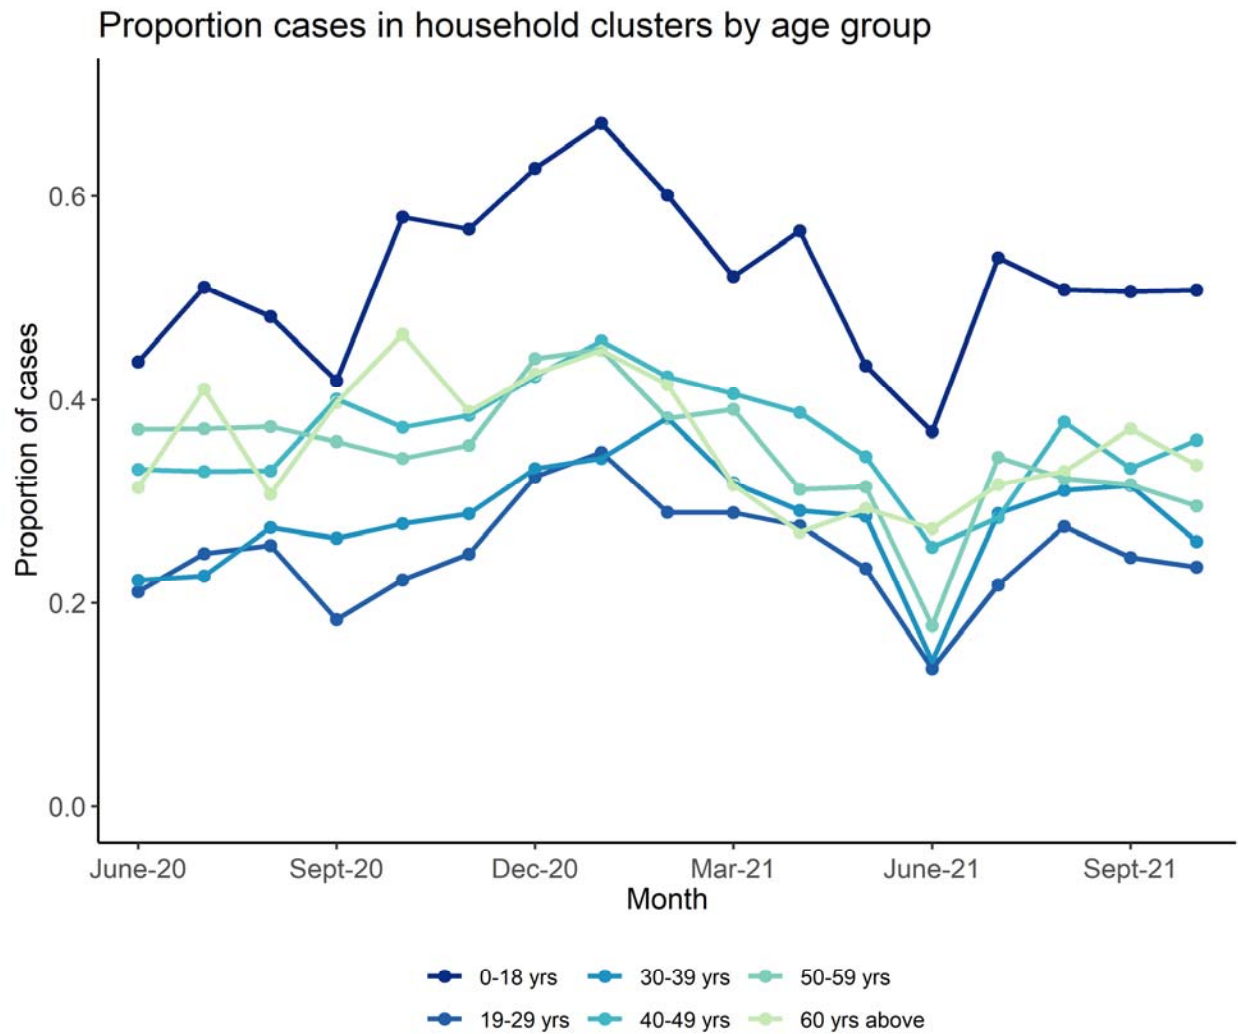

289  
290  
291  
292  
293  
294  
295  
296  
297

298 **Figure 3.** Temporal trend in the age distribution of first diagnosed case among household clusters (N= 299 7689) identified in Fulton County, Georgia between June 1, 2020 and Oct 31, 2021

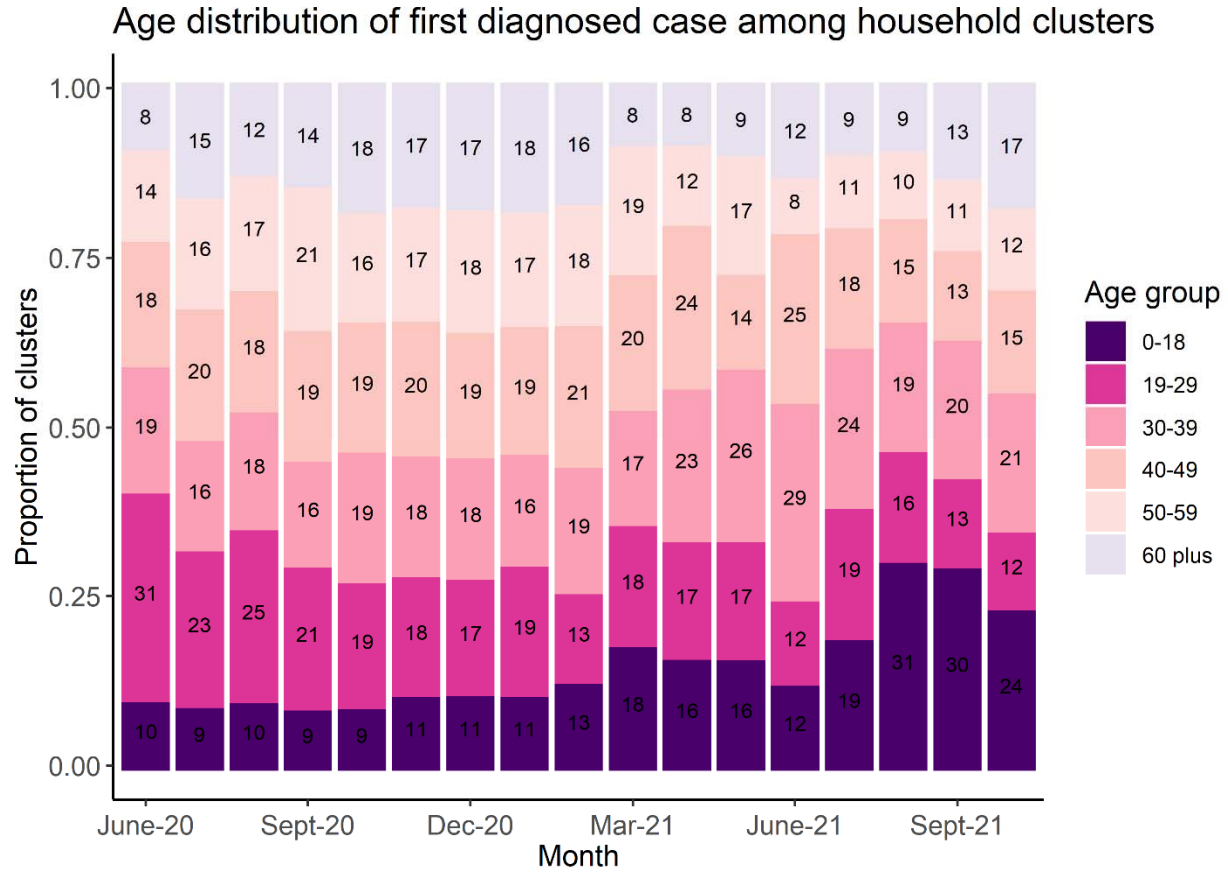

300  
301  
302  
303  
304  
305  
306  
307  
308  
309  
310  
311

312 Figure 4. Bubble plot of distribution of clusters across different cluster age profiles where the x-axis is  
313 the age of first diagnosed case in the household cluster, y-axis is the age of subsequent secondary  
314 diagnosis in the household cluster, the size of bubble represents number of clusters by each age pairing  
315 of first diagnosed case and subsequent cases and the density representing more common cluster age  
316 profiles (on the diagonal between cases of the same age in the same household and the two off-  
317 diagonal “wings” representing intergenerational clusters).

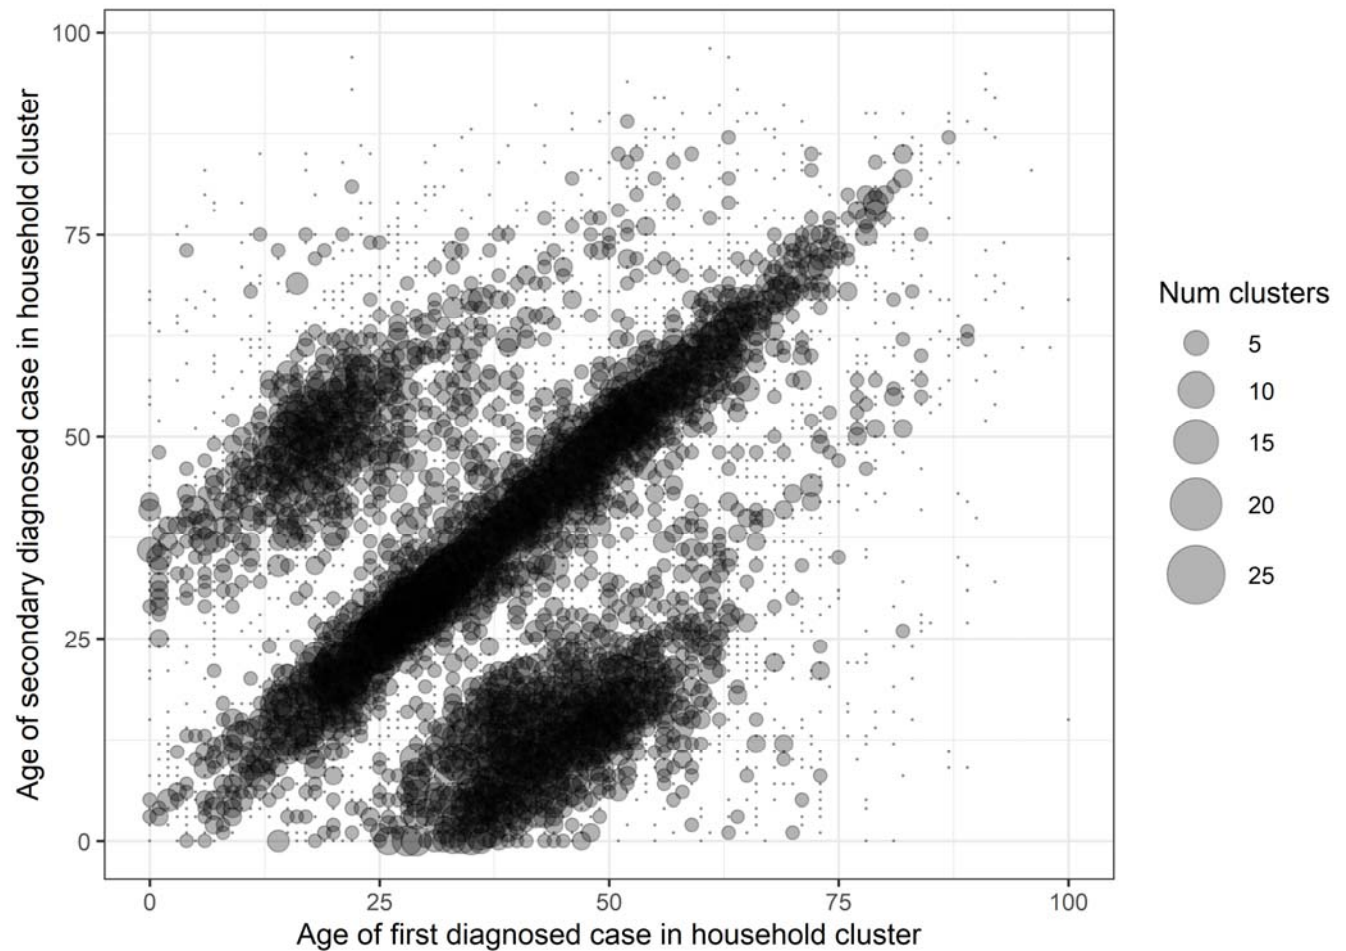

318

319

320

321

322

323

324

325

326 References

- 327 1. Leclerc QJ, Fuller NM, Knight LE, CCMID COVID-19 Working Group, Funk S, Knight GM. What  
328 settings have been linked to SARS-CoV-2 transmission clusters? *Wellcome open research*. 2020;5(83).
- 329 2. Liu Y, Eggo RM, Kucharski AJ. Secondary attack rate and superspreading events for SARS-CoV-2.  
330 *The Lancet*. 2020;395(10227):e47. doi:10.1016/S0140-6736(20)30462-1
- 331 3. Majra D, Benson J, Pitts J, Stebbing J. SARS-CoV-2 (COVID-19) superspreader events. *Journal of*  
332 *Infection*. 2021;82(1):36-40. doi:10.1016/j.jinf.2020.11.021
- 333 4. Furuse Y, Sando E, Tsuchiya N, et al. Clusters of Coronavirus Disease in Communities, Japan,  
334 January–April 2020. *Emerg Infect Dis*. 2020;26(9):2176-2179. doi:10.3201/eid2609.202272
- 335 5. Choi YJ, Park M jeong, Park SJ, et al. Types of COVID-19 clusters and their relationship with social  
336 distancing in the Seoul metropolitan area, South Korea. *International Journal of Infectious Diseases*.  
337 2021;106:363-369. doi:10.1016/j.ijid.2021.02.058
- 338 6. Hamner L, Dubbel P, Capron I, et al. High SARS-CoV-2 Attack Rate Following Exposure at a Choir  
339 Practice — Skagit County, Washington, March 2020. *MMWR Morb Mortal Wkly Rep*. 2020;69(19):606-  
340 610. doi:10.15585/mmwr.mm6919e6
- 341 7. Lemieux JE, Siddle KJ, Shaw BM, et al. Phylogenetic analysis of SARS-CoV-2 in Boston highlights  
342 the impact of superspreading events. *Science*. 2021;371(6529):eabe3261. doi:10.1126/science.abe3261
- 343 8. World Health Organization. WHO China Joint Mission on Covid19 Final Report. Published online  
344 2020.
- 345 9. Cluster infections play important roles in the rapid evolution of COVID-19 transmission: A  
346 systematic review | Elsevier Enhanced Reader. doi:10.1016/j.ijid.2020.07.073
- 347 10. Cevik M, Marcus J, Buckee C, Smith T. SARS-CoV-2 transmission dynamics should inform policy.  
348 *Clinical Infectious Diseases*. Published online September 23, 2020.  
349 doi:<https://doi.org/10.1093/cid/ciaa1442>
- 350 11. Luo L, Liu D, Liao X, et al. Contact Settings and Risk for Transmission in 3410 Close Contacts of  
351 Patients With COVID-19 in Guangzhou, China. *Annals of Internal Medicine*.:12.
- 352 12. Ng OT, Marimuthu K, Koh V, Pang J, Linn KZ, Lee V. SARS-CoV-2 seroprevalence and transmission  
353 risk factors among high-risk close contacts: a retrospective cohort study. *Lancet Infectious Diseases*.  
354 21(3):333-343.
- 355 13. Bi Q, Wu Y, Mei S, et al. Epidemiology and transmission of COVID-19 in 391 cases and 1286 of  
356 their close contacts in Shenzhen, China: a retrospective cohort study. *The Lancet Infectious Diseases*.  
357 2020;20(8):911-919. doi:10.1016/S1473-3099(20)30287-5
- 358 14. Brauner JM, Mindermann S, Sharma M, et al. Inferring the effectiveness of government  
359 interventions against COVID-19. *Science*. Published online December 15, 2020:eabd9338.  
360 doi:10.1126/science.abd9338



- 361 15. Guy GP, Massetti GM, Sauber-Schatz E. Mask Mandates, On-Premises Dining, and COVID-19.  
362 *JAMA*. Published online April 1, 2021. doi:10.1001/jama.2021.5455
- 363 16. The assessment of transmission efficiency and latent infection period in asymptomatic carriers  
364 of SARS-CoV-2 infection | Elsevier Enhanced Reader. doi:10.1016/j.ijid.2020.06.036
- 365 17. Curmei M, Ilyas A, Evans O, Steinhardt J. *Estimating Household Transmission of SARS-CoV-2*.  
366 *Epidemiology*; 2020. doi:10.1101/2020.05.23.20111559
- 367 18. Madewell ZJ, Yang Y, Longini IM, Halloran ME, Dean NE. Household Transmission of SARS-CoV-2:  
368 A Systematic Review and Meta-analysis. *JAMA Netw Open*. 2020;3(12):e2031756.  
369 doi:10.1001/jamanetworkopen.2020.31756
- 370 19. Fung HF, Martinez L, Alarid-Escudero F, et al. The household secondary attack rate of SARS-CoV-  
371 2: A rapid review. *Clinical Infectious Diseases*. Published online October 12, 2020:ciaa1558.  
372 doi:10.1093/cid/ciaa1558
- 373 20. Koh WC, Naing L, Chaw L, et al. What do we know about SARS-CoV-2 transmission? A systematic  
374 review and meta-analysis of the secondary attack rate and associated risk factors. *PLOS ONE*.:23.
- 375 21. Shah K, Saxena D, Mavalankar D. Secondary attack rate of COVID-19 in household contacts: a  
376 systematic review. :10.
- 377 22. Madewell ZJ, Yang Y, Longini IM, Halloran ME, Dean NE. Factors Associated With Household  
378 Transmission of SARS-CoV-2: An Updated Systematic Review and Meta-analysis. *JAMA Netw Open*.  
379 2021;4(8):e2122240. doi:10.1001/jamanetworkopen.2021.22240
- 380 23. Public Health England. SARS-CoV-2 variants of concern and variants under investigation.  
381 Published online June 3, 2021:66.
- 382 24. Dougherty K, Mannell M, Naqvi O, Matson D, Stone J. SARS-CoV-2 B.1.617.2 (Delta) Variant  
383 COVID-19 Outbreak Associated with a Gymnastics Facility — Oklahoma, April–May 2021. *MMWR Morb*  
384 *Mortal Wkly Rep*. 2021;70(28):1004-1007. doi:10.15585/mmwr.mm7028e2
- 385 25. Mossong J, Hens N, Jit M, et al. Social Contacts and Mixing Patterns Relevant to the Spread of  
386 Infectious Diseases. Riley S, ed. *PLoS Med*. 2008;5(3):e74. doi:10.1371/journal.pmed.0050074
- 387 26. Liu CY, Berlin J, Kiti MC, et al. *Rapid Review of Social Contact Patterns during the COVID-19*  
388 *Pandemic*.; 2021. doi:10.1101/2021.03.12.21253410
- 389 27. Jarvis CI, Van Zandvoort K, Gimma A, et al. Quantifying the impact of physical distance measures  
390 on the transmission of COVID-19 in the UK. *BMC Med*. 2020;18(1):124. doi:10.1186/s12916-020-01597-8
- 391 28. Coletti P, Wambua J, Gimma A, et al. *CoMix: Comparing Mixing Patterns in the Belgian*  
392 *Population during and after Lockdown*. Medrxiv; 2020. doi:10.1101/2020.08.06.20169763
- 393 29. Zhang J, Klepac P, Read JM, et al. Patterns of human social contact and contact with animals in  
394 Shanghai, China. *Sci Rep*. 2019;9(1):15141. doi:10.1038/s41598-019-51609-8
- 395 30. Davies NG, Kucharski AJ, Eggo RM, Gimma A, CMMID COVID-19 Working Group, Edmunds WJ.  
396 *The Effect of Non-Pharmaceutical Interventions on COVID-19 Cases, Deaths and Demand for Hospital*

- 397 *Services in the UK: A Modelling Study*. Infectious Diseases (except HIV/AIDS); 2020.  
398 doi:10.1101/2020.04.01.20049908
- 399 31. Verity R, Okell LC, Dorigatti I, et al. Estimates of the severity of coronavirus disease 2019: a  
400 model-based analysis. *The Lancet Infectious Diseases*. 2020;20(6):669-677. doi:10.1016/S1473-  
401 3099(20)30243-7
- 402 32. McAloon C, Collins Á, Hunt K, et al. Incubation period of COVID-19: a rapid systematic review  
403 and meta-analysis of observational research. *BMJ Open*. 2020;10(8):e039652. doi:10.1136/bmjopen-  
404 2020-039652
- 405 33. Byrne AW, McEvoy D, Collins AB, et al. Inferred duration of infectious period of SARS-CoV-2:  
406 rapid scoping review and analysis of available evidence for asymptomatic and symptomatic COVID-19  
407 cases. *BMJ Open*. 2020;10(8):e039856. doi:10.1136/bmjopen-2020-039856
- 408 34. Massachusetts Department of Public Health COVID-19 Dashboard: Weekly COVID-19 Public  
409 Health Report. Published online April 1, 2021. [https://www.mass.gov/doc/weekly-covid-19-public-  
410 health-report-april-1-2021/download](https://www.mass.gov/doc/weekly-covid-19-public-health-report-april-1-2021/download)
- 411 35. Majority of Massachusetts coronavirus clusters are from households. Boston Herald. Published  
412 October 30, 2020. Accessed July 4, 2021. [https://www.bostonherald.com/2020/10/30/majority-of-  
413 massachusetts-coronavirus-clusters-are-from-households/](https://www.bostonherald.com/2020/10/30/majority-of-massachusetts-coronavirus-clusters-are-from-households/)
- 414 36. Liu CY, Berlin J, Kiti MC, et al. Rapid Review of Social Contact Patterns During the COVID-19  
415 Pandemic. *Epidemiology*. 2021;32(6):781-791. doi:10.1097/EDE.0000000000001412
- 416 37. Kiti MC, Aguolu OG, Liu CY, et al. Social contact patterns among employees in 3 U.S. companies  
417 during early phases of the COVID-19 pandemic, April to June 2020. *Epidemics*. 2021;36:100481.  
418 doi:10.1016/j.epidem.2021.100481
- 419 38. Feehan DM, Mahmud A. Quantifying interpersonal contact in the United States during the  
420 spread of COVID-19: first results from the Berkeley Interpersonal Contact Study. :8.
- 421 39. Distribution of U.S. households by size 1970-2020. Statista. Published 2021. Accessed August 15,  
422 2021. [https://www.statista.com/statistics/242189/distribution-of-households-in-the-us-by-household-  
423 size/](https://www.statista.com/statistics/242189/distribution-of-households-in-the-us-by-household-size/)
- 424 40. Chu VT, Yousaf AR, Chang K, et al. Household Transmission of SARS-CoV-2 from Children and  
425 Adolescents. *n engl j med*. Published online 2021:3.
- 426 41. Guilamo-Ramos V, Benzekri A, Thimm-Kaiser M, Hidalgo A, Perlman DC. Reconsidering  
427 Assumptions of Adolescent and Young Adult Severe Acute Respiratory Syndrome Coronavirus 2  
428 Transmission Dynamics. *Clinical Infectious Diseases*. 2021;73(Supplement\_2):S146-S163.  
429 doi:10.1093/cid/ciaa1348
- 430 42. CDC. COVID-19 and Your Health. Centers for Disease Control and Prevention. Published February  
431 11, 2020. Accessed August 15, 2021. [https://www.cdc.gov/coronavirus/2019-ncov/if-you-are-sick/care-  
432 for-someone.html](https://www.cdc.gov/coronavirus/2019-ncov/if-you-are-sick/care-for-someone.html)

- 433 43. Sehgal AR, Himmelstein DU, Woolhandler S. Feasibility of Separate Rooms for Home Isolation  
434 and Quarantine for COVID-19 in the United States. *Ann Intern Med.* 2021;174(1):127-129.  
435 doi:10.7326/M20-4331
- 436 44. Thompson MG, Burgess JL, Naleway AL, et al. Interim Estimates of Vaccine Effectiveness of  
437 BNT162b2 and mRNA-1273 COVID-19 Vaccines in Preventing SARS-CoV-2 Infection Among Health Care  
438 Personnel, First Responders, and Other Essential and Frontline Workers — Eight U.S. Locations,  
439 December 2020–March 2021. *MMWR Morb Mortal Wkly Rep.* 2021;70(13):495-500.  
440 doi:10.15585/mmwr.mm7013e3
- 441 45. Murthy BP, Zell E, Saelee R, et al. COVID-19 Vaccination Coverage Among Adolescents Aged 12–  
442 17 Years — United States, December 14, 2020–July 31, 2021. *New York.* 2021;70(35):8.
- 443 46. Chamberlain AT, Toomey KE, Bradley H, et al. Cumulative incidence of SARS-CoV-2 infections  
444 among adults in Georgia, USA, August-December 2020. *J Infect Dis.* Published online 2021.
- 445
- 446

447 Supplementary Information

448 Supplemental Figure 1. Identifying clusters in the dataset and illustrations of scenarios that we consider  
449 as a household cluster versus scenarios that we do not consider as a household cluster. Our operational  
450 definition of household- clustered COVID-19 cases is two or more cases reporting a valid address at the  
451 same residential location less than 28 days apart. The days are by date of positive sample collection and  
452 day 1 is the date of positive sample collection of first identified case at address.

## Identifying clusters in the data

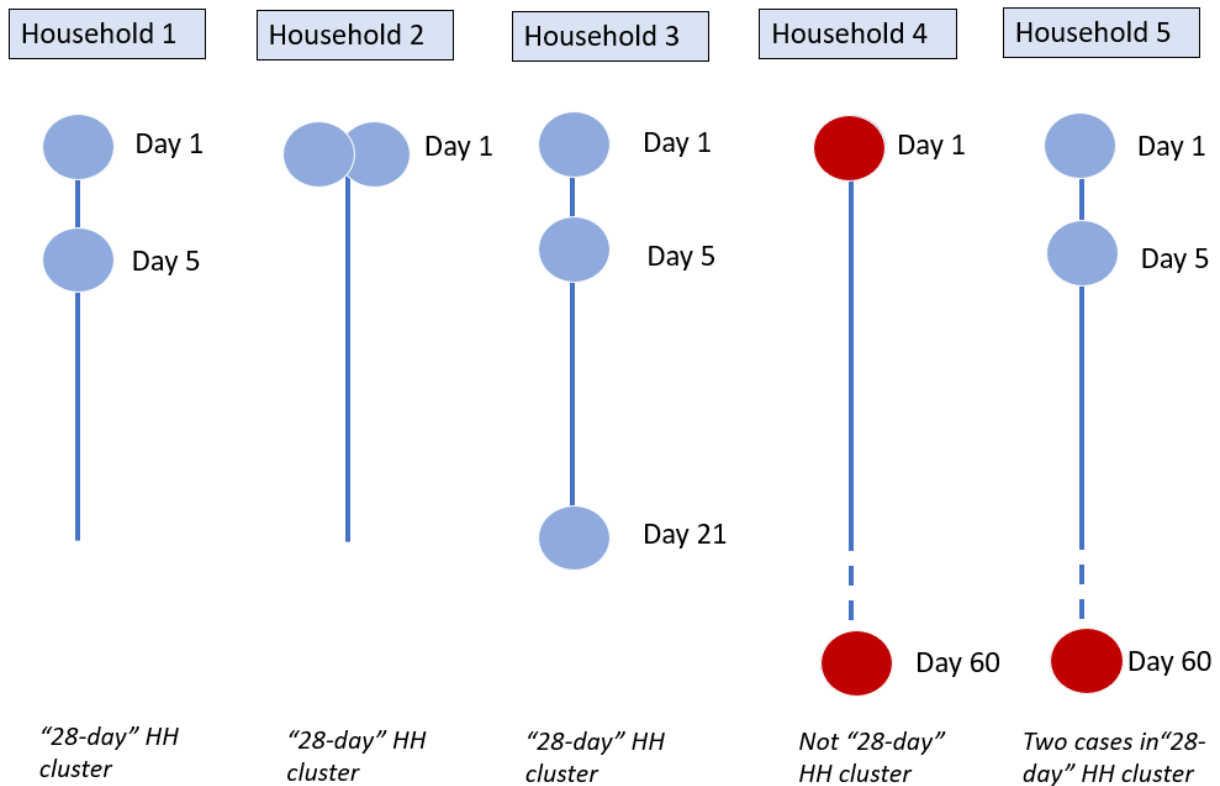

453  
454  
455  
456  
457  
458  
459  
460  
461  
462

463 Supplemental Figure 2. Flow diagram of cases included in the study

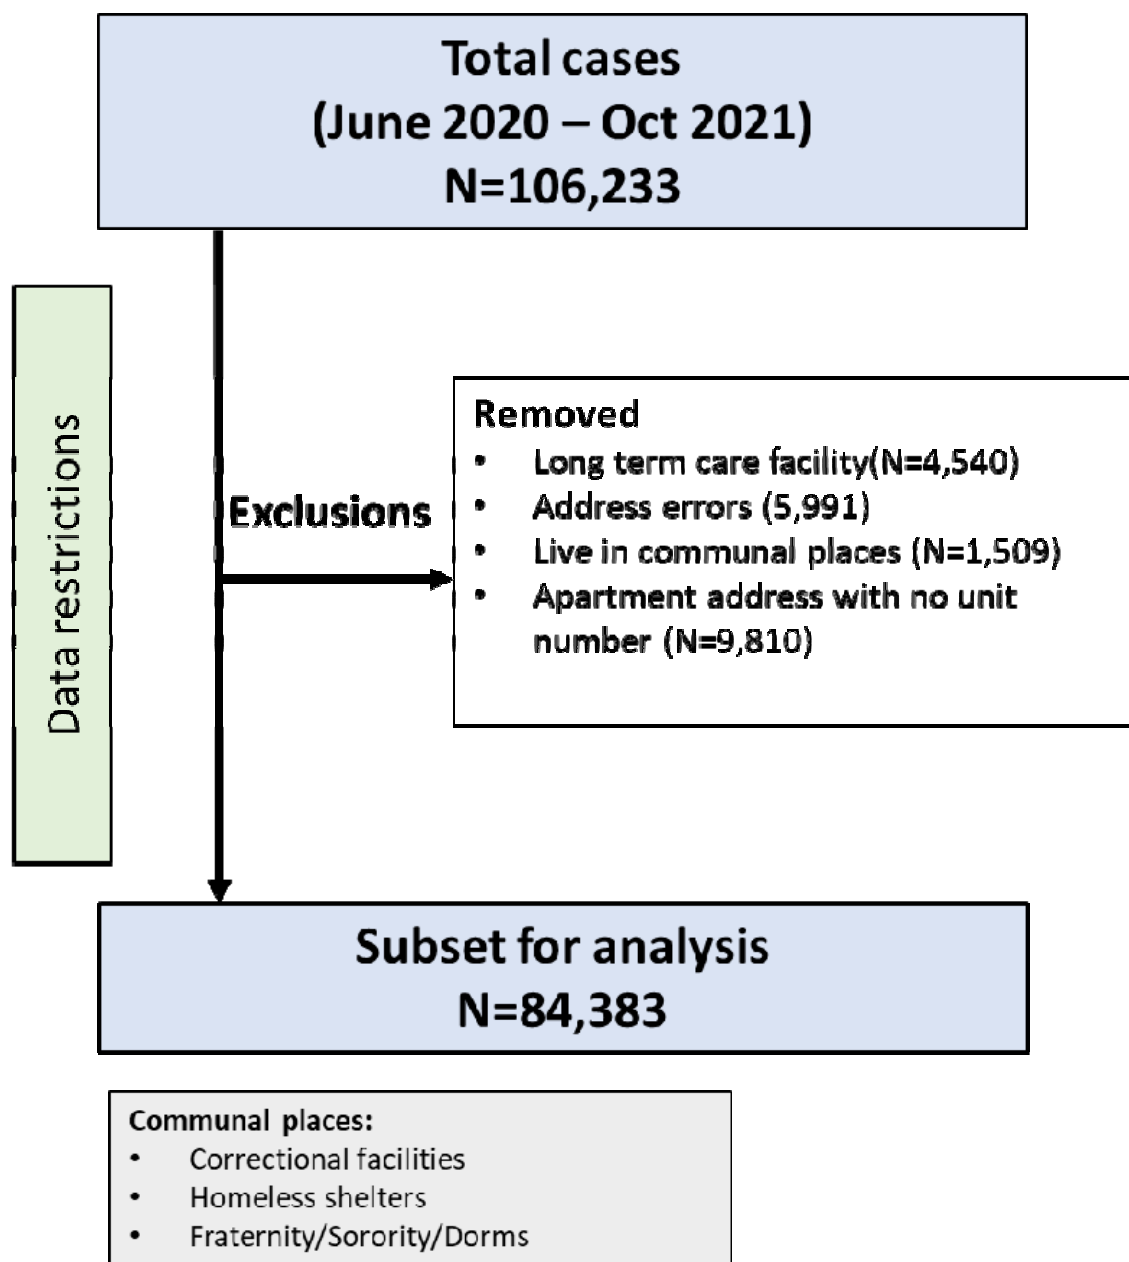

464  
465  
466  
467  
468  
469  
470

471 Supplemental Table 1.

|                       | Value                 | Total         | Included     | Excluded     | % Included  |
|-----------------------|-----------------------|---------------|--------------|--------------|-------------|
| <b>Total</b>          |                       | <b>106233</b> | <b>84383</b> | <b>21850</b> | <b>79.4</b> |
| <b>Age group</b>      | 0-18                  | 17297         | 14726 (17.5) | 2571 (11.8)  | 85.1        |
|                       | 19-29                 | 25186         | 18647 (22.1) | 6539 (29.9)  | 74          |
|                       | 30-39                 | 20481         | 16125 (19.1) | 4356 (19.9)  | 78.7        |
|                       | 40-49                 | 15766         | 13050 (15.5) | 2716 (12.4)  | 82.8        |
|                       | 50-59                 | 13391         | 11254 (13.3) | 2137 (9.8)   | 84          |
|                       | 60-69                 | 7700          | 6263 (7.4)   | 1437 (6.6)   | 81.3        |
|                       | 70 plus               | 6345          | 4292 (5.1)   | 2053 (9.4)   | 67.6        |
|                       | NA                    | 67            | 26 (0)       | 41 (0.2)     | 38.8        |
| <b>Gender</b>         | Female                | 56559         | 44940 (53.3) | 11619 (53.2) | 79.5        |
|                       | Male                  | 49171         | 39150 (46.4) | 10021 (45.9) | 79.6        |
|                       | NA                    | 503           | 293 (0.3)    | 210 (1)      | 58.3        |
| <b>Race/ethnicity</b> | 1-Asian, NH           | 4187          | 3503 (4.2)   | 684 (3.1)    | 83.7        |
|                       | 2-Black, NH           | 48237         | 38128 (45.2) | 10109 (46.3) | 79          |
|                       | 3-White, NH           | 34191         | 28272 (33.5) | 5919 (27.1)  | 82.7        |
|                       | 4-Hispanic, all races | 10608         | 7776 (9.2)   | 2832 (13)    | 73.3        |
|                       | 5-Other, NH           | 3400          | 2678 (3.2)   | 722 (3.3)    | 78.8        |
|                       | NA                    | 5610          | 4026 (4.8)   | 1584 (7.2)   | 71.8        |
| <b>Hospitalized</b>   | No                    | 58201         | 46602 (55.2) | 11599 (53.1) | 80.1        |
|                       | Yes                   | 6391          | 4758 (5.6)   | 1633 (7.5)   | 74.4        |
|                       | NA                    | 41641         | 33023 (39.1) | 8618 (39.4)  | 79.3        |
| <b>Symptom status</b> | No                    | 11607         | 8812 (10.4)  | 2795 (12.8)  | 75.9        |
|                       | Unknown               | 32397         | 26324 (31.2) | 6073 (27.8)  | 81.3        |
|                       | Yes                   | 62229         | 49247 (58.4) | 12982 (59.4) | 79.1        |
| <b>Month</b>          | 2020-06               | 5053          | 3828 (4.5)   | 1225 (5.6)   | 75.8        |
|                       | 2020-07               | 11702         | 8719 (10.3)  | 2983 (13.7)  | 74.5        |
|                       | 2020-08               | 5233          | 3829 (4.5)   | 1404 (6.4)   | 73.2        |
|                       | 2020-09               | 2708          | 2036 (2.4)   | 672 (3.1)    | 75.2        |
|                       | 2020-10               | 3731          | 2890 (3.4)   | 841 (3.8)    | 77.5        |
|                       | 2020-11               | 7096          | 5520 (6.5)   | 1576 (7.2)   | 77.8        |
|                       | 2020-12               | 15019         | 11855 (14)   | 3164 (14.5)  | 78.9        |
|                       | 2021-01               | 16318         | 13779 (16.3) | 2539 (11.6)  | 84.4        |
|                       | 2021-02               | 5339          | 4378 (5.2)   | 961 (4.4)    | 82          |
|                       | 2021-03               | 3540          | 2905 (3.4)   | 635 (2.9)    | 82.1        |
|                       | 2021-04               | 3012          | 2383 (2.8)   | 629 (2.9)    | 79.1        |
|                       | 2021-05               | 1304          | 1036 (1.2)   | 268 (1.2)    | 79.4        |
|                       | 2021-06               | 465           | 365 (0.4)    | 100 (0.5)    | 78.5        |
|                       | 2021-07               | 3413          | 2761 (3.3)   | 652 (3)      | 80.9        |
|                       | 2021-08               | 11890         | 9652 (11.4)  | 2238 (10.2)  | 81.2        |
|                       | 2021-09               | 7849          | 6336 (7.5)   | 1513 (6.9)   | 80.7        |
|                       | 2021-10               | 2561          | 2111 (2.5)   | 450 (2.1)    | 82.4        |

472

473

474

475

476

477 Supplemental Figure 3. Proportion of COVID-19 cases in each household cluster size when clusters were  
478 counted for the entire outbreak versus when clusters were restricted to those within 28 days of  
479 subsequent positive sample collections

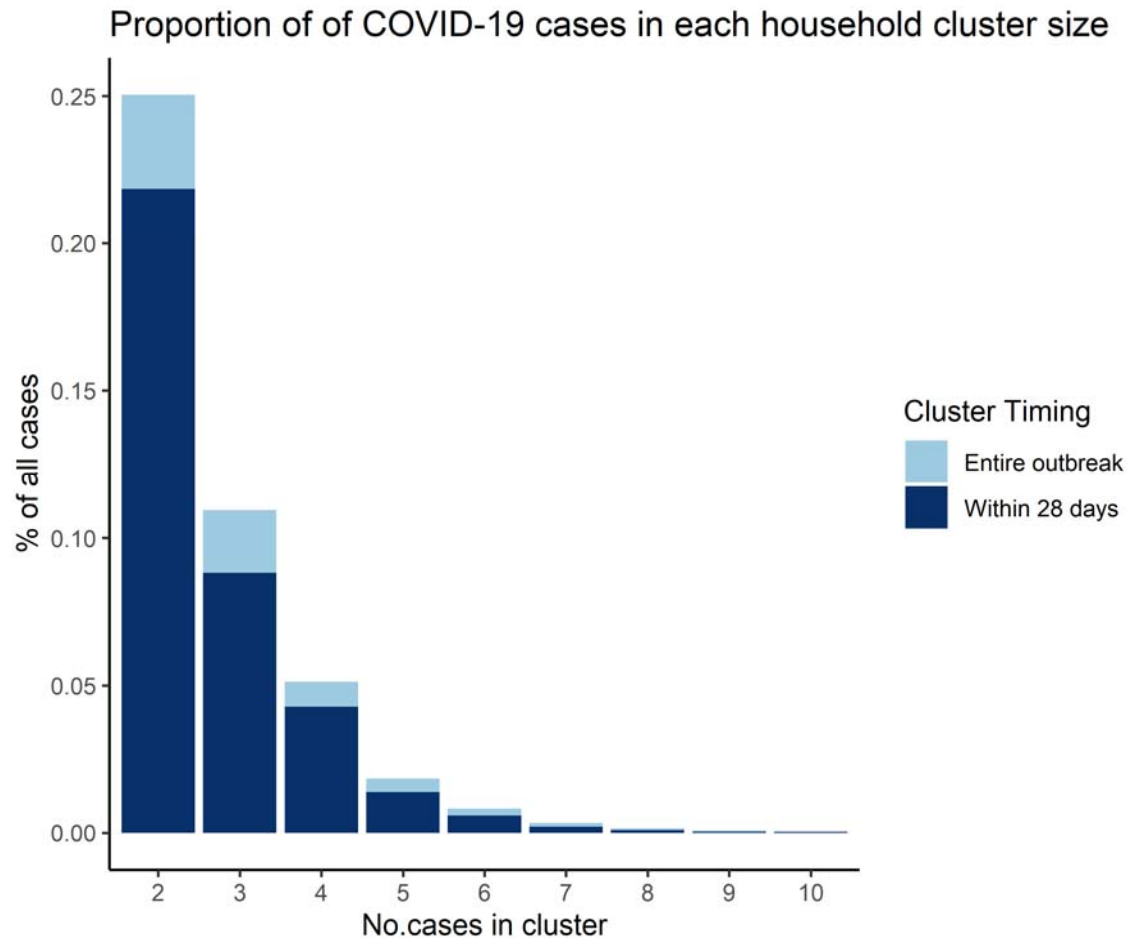

480

481

482 Supplemental Figure 4. Temporal trend in the proportion of diagnosed cases in Fulton County, Georgia,  
483 that was identified in household clusters stratified by month of positive sample collection date (x-axis)  
484 and race/ethnicity.

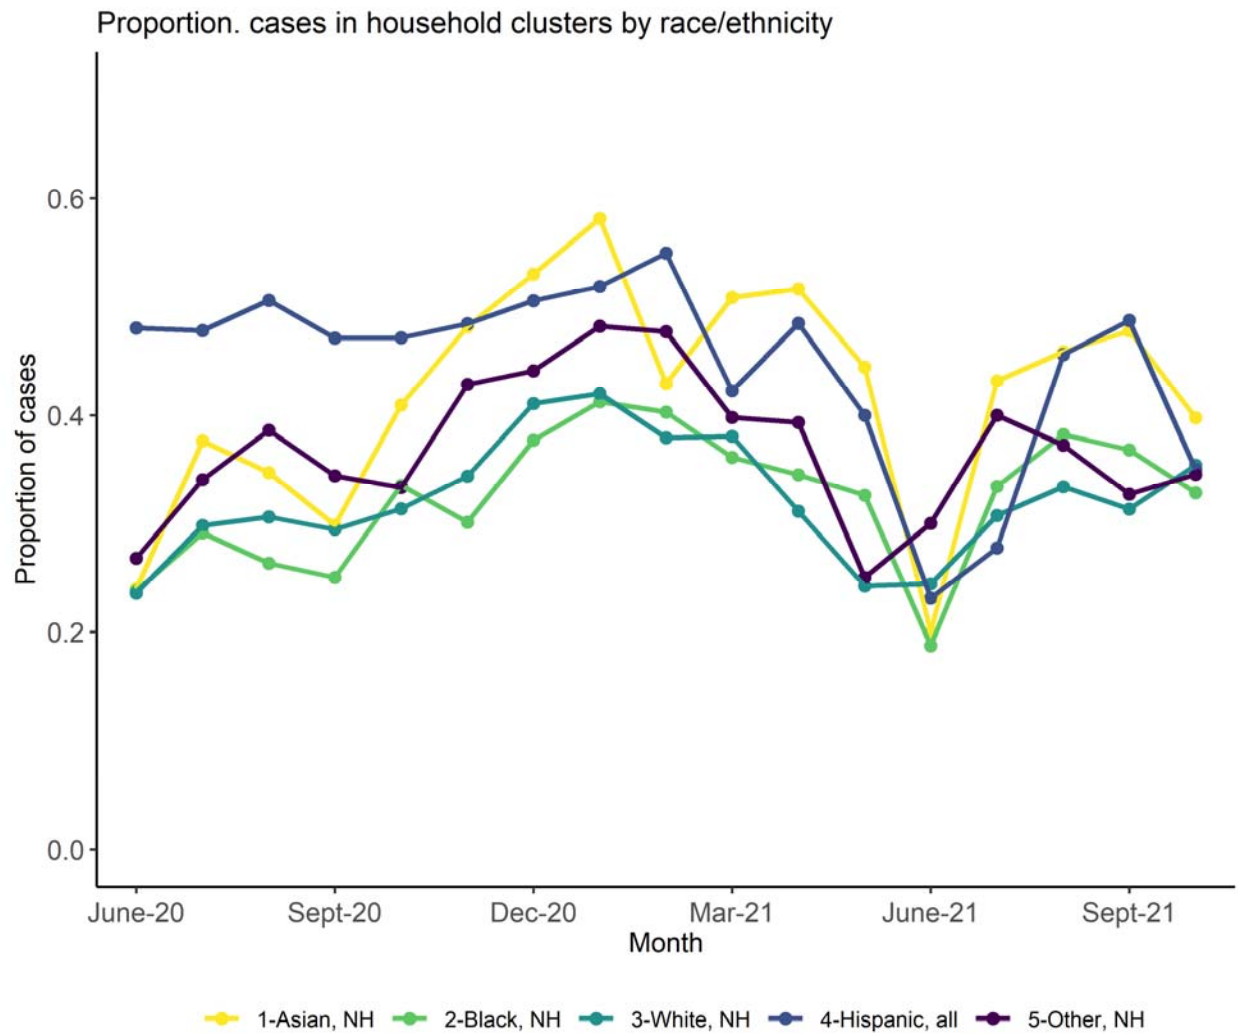

485  
486  
487  
488  
489  
490  
491  
492  
493



494 Supplemental Table 2. Average number of household members (all ages and children 0-18 years) per  
495 household by race/ethnicity.

|           | Average number household members (all ages) | Average number of children (0-18 years) per household |
|-----------|---------------------------------------------|-------------------------------------------------------|
| All races | 2.36                                        | 0.58                                                  |
| Asian     | 2.79                                        | 0.74                                                  |
| Black     | 2.41                                        | 0.65                                                  |
| Hispanic  | 3.38                                        | 1.11                                                  |
| White     | 2.22                                        | 0.47                                                  |

496
